# Supplementary material for: Gluten Assessment in Beers: Comparison by Different Commercial ELISA Kits and Evaluation of NIR Analysis as a Complementary Technique
Source: MDPI journal article supplement (doi:10.3390/foods10061170), 2021-05-23
Supplement: s1 [file s1]

Table S1. Assigned gluten results in commercial beers by three enzyme-Linked ImmunoSorbent Assays

| Beer ID         | Manufacturer | Yeast style | Ingredients                                                                                                     | Gluten content<br>mg/kg |           |                                   |
|-----------------|--------------|-------------|-----------------------------------------------------------------------------------------------------------------|-------------------------|-----------|-----------------------------------|
|                 |              |             |                                                                                                                 | R5 competitive          | R5 direct | $\alpha$ 20gliadin<br>competitive |
| Labelled GF _1  | Industrial   | Lager       | Water, barley malt, corn, barley, hops                                                                          | <10.0                   | <0.25     | 6.0                               |
| Labelled GF _2  | Industrial   | Lager       | Natural mineral water, barley malt, hops                                                                        | <10.0                   | <0.25     | <3.6                              |
| Labelled GF _3  | Industrial   | Lager       | Water, barley malt and hops                                                                                     | <10.0                   | <0.25     | <3.6                              |
| Labelled GF _4  | Industrial   | Lager       | Water, barley malt, oat, yuzu pasta, shichimi toragashi (sesame), hops and yeast.                               | 30.2                    | 1.5       | 6.8                               |
| Labelled GF _5  | Craft        | Ale         | Water, barley malt, hops, yeast                                                                                 | <10.0                   | <0.25     | <3.6                              |
| Labelled GF _6  | Craft        | Ale         | Water, barley malt, hops and yeast                                                                              | <10.0                   | <0.25     | <3.6                              |
| Labelled GF _7  | Industrial   | Lager       | Water, barley malt, corn, hops                                                                                  | <10.0                   | <0.25     | <3.6                              |
| Labelled GF _8  | Industrial   | Lager       | Water, barley malt, barley, corn, hops, hop extract                                                             | <10.0                   | <0.25     | <3.6                              |
| Labelled GF _9  | Craft        | Lager       | Barley malt, yeast, hops                                                                                        | <10.0                   | <0.25     | <3.6                              |
| Labelled GF _10 | Industrial   | Ale         | Water, barley malt, hops and yeast                                                                              | <10.0                   | <0.25     | <3.6                              |
| Labelled GF _11 | Craft        | Lager       | Water, barley malt, oatmeal, hops, yeast                                                                        | 343                     | 42.6      | 80.2                              |
| Labelled GF _12 | Craft        | Ale         | Water, barley malt, hops, yeast                                                                                 | 14                      | 6.3       | 7.0                               |
| Labelled GF _13 | Craft        | Ale         | Water, barley malt, hops, yeast                                                                                 | <10.0                   | <0.25     | <3.6                              |
| Labelled GF _14 | Industrial   | Ale         | Water, barley malt, oat malt, rice flakes, hops, spices, lactic acid, inverted cane sugar, yeast, ascorbic acid | <10.0                   | <0.25     | <3.6                              |
| Labelled GF _15 | Craft        | Lager       | Water, barley malt, hops                                                                                        | <10.0                   | <0.25     | <3.6                              |
| Labelled GF _16 | Industrial   | Ale         | Barley, wheat                                                                                                   | <10.0                   | <0.25     | <3.6                              |
| Labelled GF _17 | Industrial   | Ale         | Water, barley, oatmeal, hops, yeast                                                                             | 58.8                    | 9.7       | 4.6                               |
| Labelled GF _18 | Craft        | Ale         | Water, barley malts, oat flakes, hops, yeast                                                                    | <10.0                   | <0.25     | <3.6                              |
| Labelled GF _19 | Industrial   | Ale         | Barley, oatmeal, wheat, water, yeast and hops                                                                   | <10.0                   | <0.25     | <3.6                              |
| Labelled GF _20 | Industrial   | Ale         | Water, barley/wheat malt, hops, yeast, spices                                                                   | <10.0                   | <0.25     | <3.6                              |
| Labelled GF _21 | Industrial   | Ale         | Water, barley malt, hops, yeast, spices                                                                         | <10.0                   | <0.25     | <3.6                              |
| Labelled GF _22 | Industrial   | Lager       | Water, barley malt, rice, hops                                                                                  | <10.0                   |           |                                   |
| Labelled GF _23 | Industrial   | Lager       | Water, barley malt, corn and hops                                                                               | <10.0                   |           |                                   |
| Labelled GF _24 | Industrial   | Lager       | Water, barley malt, corn, hops                                                                                  | <10.0                   |           |                                   |
| Labelled GF _25 | Industrial   | Lager       | Water, barley malt, corn and hops                                                                               | <10.0                   |           |                                   |
| Labelled GF _26 | Industrial   | Lager       | Water, barley malt, rice, maiz, hops                                                                            | <10.0                   |           |                                   |
| Labelled GF _27 | Industrial   | Ale         | Water, malta, levadura, CO <sub>2</sub>                                                                         | <10.0                   |           |                                   |

| Beer ID          | Manufacturer | Yeast style | Ingredients                                                 | Gluten content<br>mg/kg |           |                                   |
|------------------|--------------|-------------|-------------------------------------------------------------|-------------------------|-----------|-----------------------------------|
|                  |              |             |                                                             | R5 competitive          | R5 direct | $\alpha$ 20gliadin<br>competitive |
| Labelled GF _28  | Industrial   | Ale         | Barley, oat                                                 | <10.0                   |           |                                   |
| Labelled GF _29  | Industrial   | Lager       | Water, barley malt, hop extract, hops                       | <10.0                   |           |                                   |
| Labelled GF _30  | Craft        | Ale         | Water, barley malt, hops and yeast                          | <10.0                   |           |                                   |
| Labelled GF _31  | Craft        | Ale         | Barley malt, millet, buckwheat, hops, yeast                 | <10.0                   |           |                                   |
| Labelled GF _32  | Industrial   | Lager       | Water, barley malt, rice, yeast and hops                    | <10.0                   |           |                                   |
| Labelled GF _33  | Industrial   | Ale         | Water, barley malt, rice, buckwheat, yeast, hops and spices | <10.0                   |           |                                   |
| Labelled GF _34  | Craft        | Lager       | Water, barley and rye malts, hops and yeast                 | <10.0                   |           |                                   |
| Labelled GF _35  | Craft        | Ale         | Water, barley malt, hops and yeast                          | <10.0                   |           |                                   |
| Labelled GF _36  | Craft        | Ale         | Water, malts, hops and yeast                                | 11.8                    |           |                                   |
| Labelled GF _37  | Craft        | Ale         | Water, barley malt, hops and yeast                          | <10.0                   |           |                                   |
| Labelled GF _38  | Craft        | Ale         | Water, barley malt, hops and yeast                          | <10.0                   |           |                                   |
| Labelled GF _39  | Craft        | Lager       | *                                                           | <10.0                   |           |                                   |
| Labelled GF _40  | Craft        | Ale         | Water, barley malt, hops and yeast                          | <10.0                   |           |                                   |
| Labelled GF _41  | Industrial   | Ale         | Barley, oat, rye, buckwheat                                 | <10.0                   |           |                                   |
| Conventional _1  | Industrial   | Ale         | Barley malt, wheat malt and wheat                           | 60.6                    | 15.4      | 164.2                             |
| Conventional _2  | Industrial   | Ale         | Barley and wheat malt                                       | 55.0                    | 7.6       | 39.6                              |
| Conventional _3  | Industrial   | Lager       | Barley malt                                                 | 32.0                    | 1.6       | 12.7                              |
| Conventional _4  | Craft        | Ale         | Water, barley malt, hops, yeast                             | 65.8                    | 8.9       | 22.1                              |
| Conventional _5  | Industrial   | Lager       | Water, barley malt, hop extract                             | 34.8                    | 4.6       | 12.9                              |
| Conventional _6  | Industrial   | Lager       | Water, barley malt, corn, hops                              | <10.0                   | <0.25     | <3.6                              |
| Conventional _7  | Industrial   | Lager       | Water, barley malt, corn, hops                              | 41.2                    | 6.2       | 12.8                              |
| Conventional _8  | Industrial   | Lager       | Water, barley malt, corn, rice, hops                        | <10.0                   | <0.25     | <3.6                              |
| Conventional _9  | Craft        | Lager       | Water, barley malt, hops, yeast                             | 37.0                    | 7.3       | 18.3                              |
| Conventional _10 | Industrial   | Lager       | Water, malta barley, corn, hops, yeast                      | 114.2                   | 20.3      | 37.9                              |
| Conventional _11 | Industrial   | Lager       | Water, barley malt, maltose, hop extract                    | 35.0                    | 4.7       | 8.9                               |
| Conventional _12 | Craft        | Ale         | Water, barley and wheat malt, hops, yeast                   | 100.8                   | 26.8      | 107.2                             |
| Conventional _13 | Craft        | Ale         | Water, barley malts, hops, yeast                            | 26.8                    | 1.0       | 7.7                               |
| Conventional _14 | Industrial   | Lager       | Water, barley malt, hops, hop extract                       | 63.4                    | 9.5       | 19.0                              |
| Conventional _15 | Industrial   | Lager       | Water, barley malt, corn, hop extract                       | 63.8                    | 6.3       | 13.8                              |

| Beer ID          | Manufacturer | Yeast style | Ingredients                                                            | Gluten content<br>mg/kg |           |                                   |
|------------------|--------------|-------------|------------------------------------------------------------------------|-------------------------|-----------|-----------------------------------|
|                  |              |             |                                                                        | R5 competitive          | R5 direct | $\alpha$ 20gliadin<br>competitive |
| Conventional _16 | Industrial   | Lager       | Water, barley malt, corn, barley, hops                                 | <10.0                   | <0.25     | 4.4                               |
| Conventional _17 | Industrial   | Ale         | Water, wheat malt, barley malt, hop extract                            | 1169.8                  | 90.0      | 1327.2                            |
| Conventional _18 | Industrial   | Ale         | Water, barley malt, glucose syrup, wheat malt, aromatic caramel, hops  | 148.8                   | 54.0      | 238.6                             |
| Conventional _19 | Industrial   | Ale         | Water, wheat malt, barley malt, yeast, hops                            | 3716.6                  | 503.8     | 1881.0                            |
| Conventional _20 | Industrial   | Lager       | Water, barley malt, treated hops, hop extract                          | 43.4                    | 5.9       | 25.6                              |
| Conventional _21 | Industrial   | Lager       | Water, barley malt, corn, hops                                         | 60.4                    | 10.0      | 21.7                              |
| Conventional _22 | Craft        | Ale         | Barley malta; wheat flakes, cande sugar, dextrose, hops, yeast         | 160.8                   | 49.9      | 74.6                              |
| Conventional _23 | Craft        | Ale         | Barley malta; oat malt, hops, dextrose, yeast                          | 80                      | 14.8      | 11.9                              |
| Conventional _24 | Industrial   | Lager       | Barley malt                                                            | 25.2                    | 2.5       | 5.0                               |
| Conventional _25 | Industrial   | Lager       | Barley malt                                                            | 17.6                    | 5.0       | 3.6                               |
| Conventional _26 | Craft        | Ale         | Water, barley malt, hops, yeast                                        | 67.8                    | 19.1      | 26.7                              |
| Conventional _27 | Industrial   | Ale         | Water, wheat and barley malt, hops, yeast                              | 1241                    | 151.1     | 762.2                             |
| Conventional _28 | Industrial   | Ale         | Water, barley malt, hops, yeast                                        | 31.6                    | 4.8       | 15.2                              |
| Conventional _29 | Industrial   | Lager       | Water, 2 barley malts, 1 wheat malt, 4 varieties of hops, yeast        | 248                     | 108.7     | 439.2                             |
| Conventional _30 | Industrial   | Ale         | Water, 3 barley malts, 1 wheat malt, 4 varieties of hops, yeast        | 1036.8                  | 78.0      | 757.2                             |
| Conventional _31 | Industrial   | Lager       | Water, two barley malts, 1 wheat malt, 4 varieties of hops, yeast      | 628.4                   | 83.2      | 515.8                             |
| Conventional _32 | Industrial   | Lager       | Water, barley malt, hops, hop extract                                  | 26.8                    | 4.3       | 19.0                              |
| Conventional _33 | Industrial   | Lager       | Water, barley malt, rice, corn, hops                                   | <10.0                   | <0.25     | <3.6                              |
| Conventional _34 | Craft        | Ale         | Water, barley malt, hops, yeast                                        | <10.0                   | <0.25     | 7.2                               |
| Conventional _35 | Craft        | Ale         | Water, barley malt, hops, yeast                                        | 23.6                    | 2.2       | 7.0                               |
| Conventional _36 | Industrial   | Lager       | Water, barley malt, hops, hop extract                                  | 38.0                    | 10.2      | 19.4                              |
| Conventional _37 | Industrial   | Ale         | Barley and wheat malt                                                  | 2192.4                  | 278.2     | 828.0                             |
| Conventional _38 | Industrial   | Ale         | Water, wheat malt, barley malt, hop extract, yeast                     | 3171.4                  | 434.4     | 1885.4                            |
| Conventional _39 | Craft        | Ale         | Water, hops, yeast, barley malta                                       | 40.8                    | 9.2       | 11.6                              |
| Conventional _40 | Craft        | Ale         | Water, hops, yeast, wheat malt, barley malt                            | 1363.2                  | 166.4     | 1219.6                            |
| Conventional _41 | Craft        | Ale         | Water, hops, yeast, barley malt                                        | 111.4                   | 14.0      | 33.0                              |
| Conventional _42 | Industrial   | Ale         | Water, barley malt, sugar, hops                                        | 51.8                    | 16.3      | 23.5                              |
| Conventional _43 | Industrial   | Ale         | Water, barley malt, sugar, spices (orange peel, coriander seeds), hops | 120.8                   | 41.8      | 81.3                              |
| Conventional _44 | Industrial   | Lager       | Water, barley malt, treated hops, hop extract                          | 23.8                    | 5.4       | 18.3                              |
| Conventional _45 | Craft        | Ale         | Water, barley malt, hops, yeast                                        | 33.4                    | 5.3       | 11.8                              |

| Beer ID          | Manufacturer | Yeast style | Ingredients                                                                        | Gluten content<br>mg/kg |           |                                   |
|------------------|--------------|-------------|------------------------------------------------------------------------------------|-------------------------|-----------|-----------------------------------|
|                  |              |             |                                                                                    | R5 competitive          | R5 direct | $\alpha$ 20gliadin<br>competitive |
| Conventional _46 | Industrial   | Lager       | Barley and barley malt                                                             | 61.8                    | 8.9       | 32.2                              |
| Conventional _47 | Craft        | Ale         | Water, barley malt, hops, yeast                                                    | 44.8                    | 5.0       | 24.2                              |
| Conventional _48 | Industrial   | Ale         | Water, barley malt, wheat malt, hops, yeast                                        | 245.2                   | 94.8      | 745.6                             |
| Conventional _49 | Industrial   | Ale         | Barley, wheat and oatmeal. Orange peel, coriander                                  | 2773.6                  | 391.8     | 1558.0                            |
| Conventional _50 | Craft        | Ale         | Barley malt                                                                        | 65.8                    | 11.3      | 39.0                              |
| Conventional _51 | Industrial   | Lager       | Water, barley malt, corn, barley, hops, coloring E-150c, stabilizer E-405          | <10.0                   |           |                                   |
| Conventional _52 | Industrial   | Lager       | Water, barley malt, rice, hops                                                     | <10.0                   |           |                                   |
| Conventional _53 | Industrial   | Ale         | Water, barley and wheat malt, hops and yeast                                       | 2039.6                  |           |                                   |
| Conventional _54 | Craft        | Lager       | Water, barley malt, hops and yeast                                                 | <10.0                   |           |                                   |
| Conventional _55 | Industrial   | Lager       | Water, barley malt, hops                                                           | <10.0                   |           |                                   |
| Conventional _56 | Craft        | Ale         | Water, barley malt, hops and yeast                                                 | 31.0                    |           |                                   |
| Conventional _57 | Industrial   | Lager       | Water, barley malt, corn, hops                                                     | 16.4                    |           |                                   |
| Conventional _58 | Industrial   | Ale         | Water, wheat malt, barley malt, hops and yeast                                     | 2754,2                  |           |                                   |
| Conventional _59 | Industrial   | Lager       | Water, barley malt, rice, hops                                                     | < 10.0                  |           |                                   |
| Conventional _60 | Craft        | Ale         | Water, barley malt, hops and yeast                                                 | 10.0                    |           |                                   |
| Conventional _61 | Craft        | Ale         | Water, barley malt, hops and yeast                                                 | 40.2                    |           |                                   |
| Conventional _62 | Craft        | Ale         | Water, barley malt, wheat malt, orange peel, coriander, hops and yeast             | 234,4                   |           |                                   |
| Conventional _63 | Industrial   | Ale         | Water, malt (Maris Otter), hops (Cascade and Simcoe), malted wheat and yeast (Ale) | < 10.0                  |           |                                   |
| Conventional _64 | Industrial   | Ale         | Water, malt (Extra Pale), hops (Cascade and Mosaic) and yeast (Ale)                | < 10.0                  |           |                                   |
| Conventional _65 | Craft        | Ale         | Water, malt, hops, yeast, caramel                                                  | 62.4                    |           |                                   |

GF: gluten free. \*The manufacturer does not provide raw materials on the label.
